# Supplementary material
Source: MDPI journal article supplement (https://www.mdpi.com/2073-4441/15/14/2578)
Supplement: s1 [file s1 › water-2469191-supplementary.pdf]

## Supplementary Materials

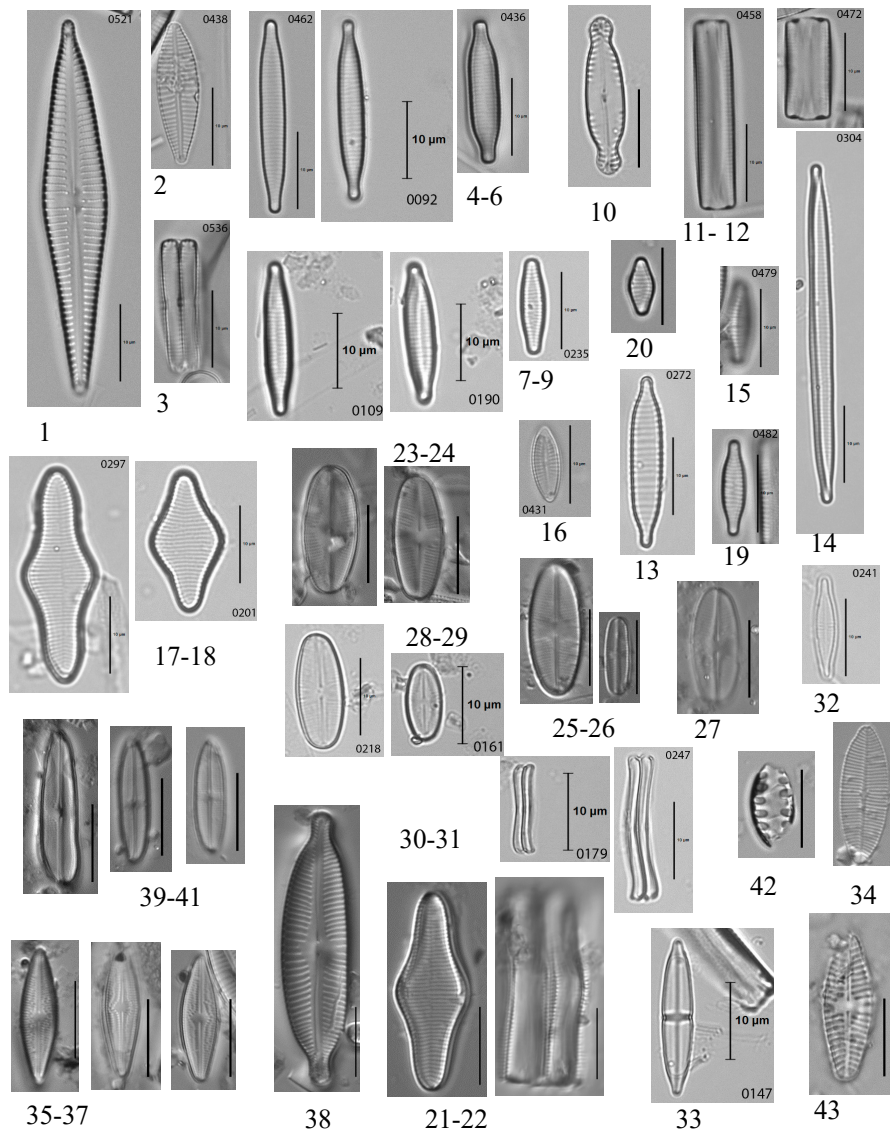

**Plate S1.** Diatoms at Upper Three Runs Creek site in 2018: Fig 1. *Gomphonema* sp. M1; Fig 2 *Gomphonema parvulum* Morphotype 3; Fig 3. *Gomphonema* spp. girdle\*; Figs 4–6. *Fragilariforma virescens* var. 1\*; Figs 7–9. *Fragilariforma virescens* var. 2; Fig 10. *Pinnularia* sp.1; Figs 11–12. *Fragilariforma* spp. girdle\*; Fig 13. *Fragilariforma* “coarse”; Fig 14. *Fragilaria* sp.1; Fig 15. *Fragilaria exigua*; Fig 16. *Achnantheidium subhudsonis* var. *kraeuselii*; Figs 17–18 *Fragilariforma* cf. *floridana*; Fig 19. *Fragilariforma bicapitata*; Fig 20. *Fragilariforma virescens*; Figs 21–22. *Fragilariforma polygonota*; Figs 23–24. *Psammothidium altaicum*; Figs 25–26. *Psammothidium helveticum*; Fig 27. *Psammothidium bioretii*; Figs 28–29. *Psammothidium subatomoides*; Figs 30–31. *Achnantheidium catenatum* girdle; Fig 32. *Achnantheidium minutissimum*; Fig 33. *Stauroneis smithii* var. *incisa*; Fig 34. *Lemnicola hungarica*; Figs 35–37. *Brachysira brebissonii*; Fig 38. *Cymbopleura naviculiformis*; Figs 39–41. *Neidium alpinum*; Fig 42. *Stauroneis martyi*; Fig 43. *Planothidium lanceolatum*. Scale bars = 10  $\mu$ m. \*Denotes taxon or OTU found at > 1% relative abundance (RA) identified from 2018 samples and 1956 archived slides collected from Upper Three Runs Creek, South Carolina.

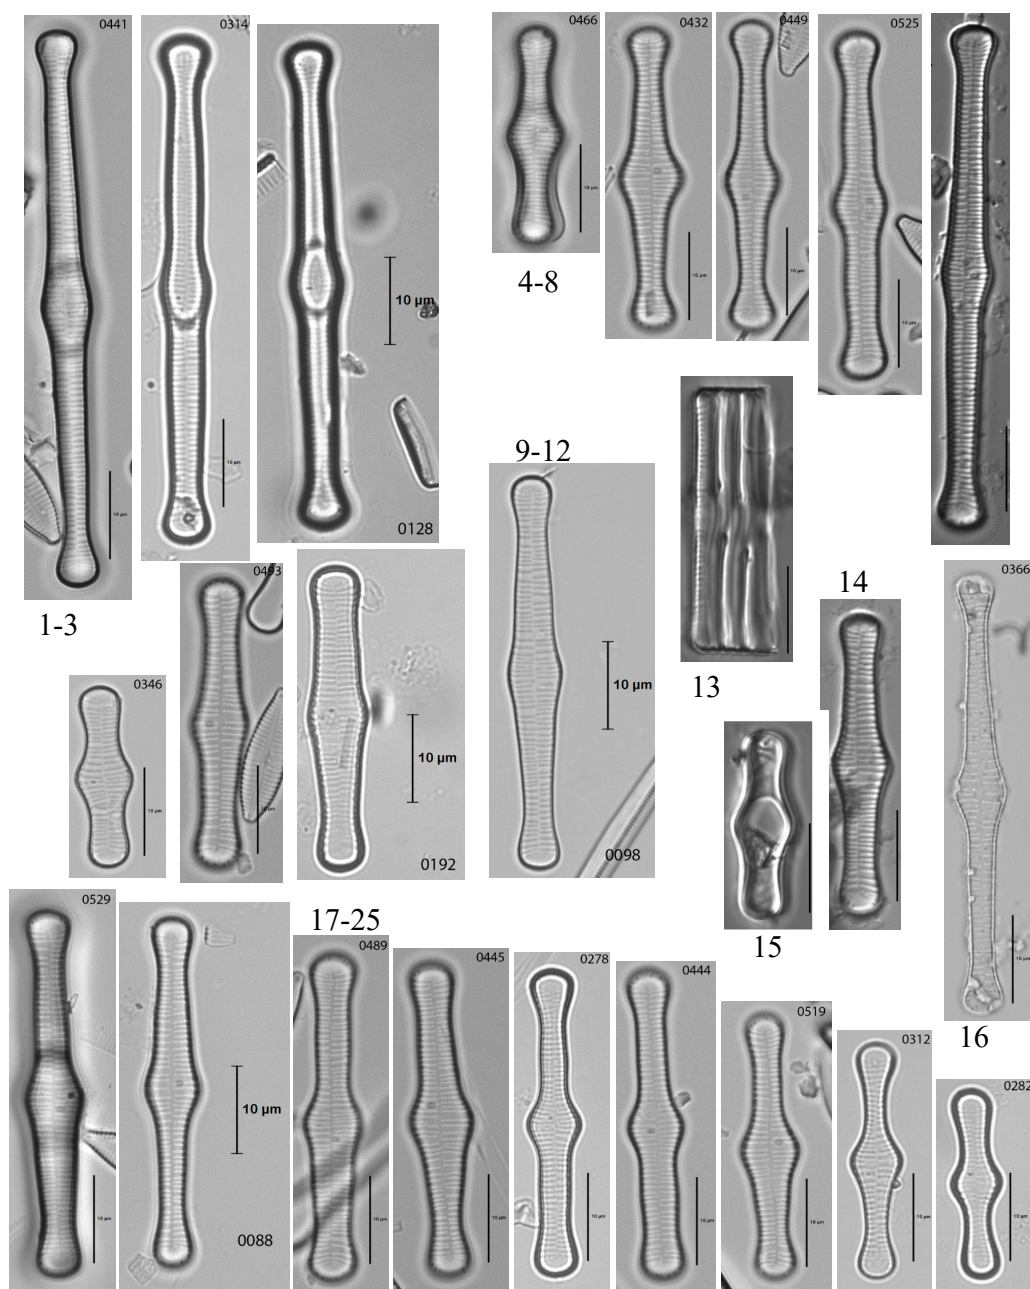

**Plate S2.** Diatoms at Upper Three Runs Creek site in 2018: Scale bars = 10  $\mu\text{m}$ . Figs 1–3. *Tabellaria quadriseptata*; Figs 4–8. *Tabellaria fenestrata*; Figs 9–12. *Tabellaria flocculosa* strain III; Fig 13. *Tabellaria* spp. girdle\*; Fig 14. *Tabellaria flocculosa*; Fig 15. *Tabellaria flocculosa* girdle band; Fig 16. *Tabellaria* sp. Transitional; Figs 17–25. *Tabellaria flocculosa* intermediate\*. \*Denotes taxon or OTU found at > 1% relative abundance (RA) identified from 2018 samples and 1956 archived slides collected from Upper Three Runs Creek, South Carolina.

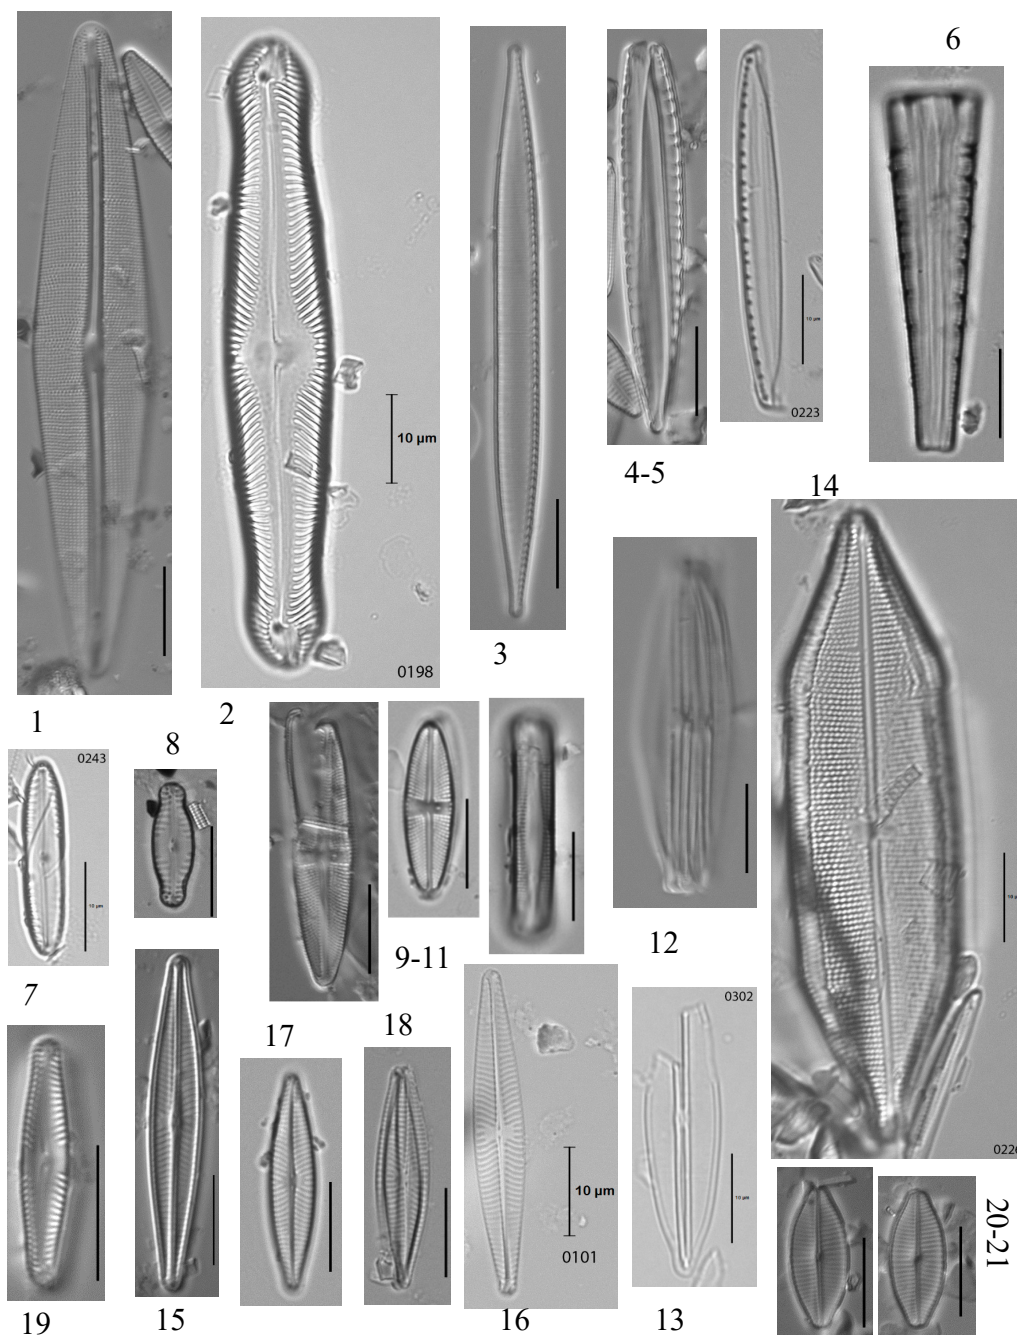

**Plate S3.** Diatoms at Upper Three Runs Creek site in 2018: Scale bars = 10  $\mu$ m. Fig 1. *Frustulia rhomboides*; Fig 2. *Pinnularia* cf. *mesogongyla*; Fig 3. *Nitzschia intermedia*; Figs 4–5. *Nitzschia recta*\*; Fig 6. *Meridion alansmithii*; Fig 7. *Pinnularia obscura*; Fig 8. *Pinnularia metzeltinii* Krammer; Figs 9–11. *Luticola goeppertiana* and girdle\*; Fig 12. *Frustulia* spp. girdle; Fig 13. *Frustulia crassinervia* \*; Fig 14. *Neidium saccoense*; Fig 15. *Navicula notha*\*; Fig 16. *Navicula leptostriata*\*; Fig 17. *Navicula exilis*; Fig 18. *Navicula* cf. *cryptotenella*; Fig 19. *Pinnularia appendiculata*; Figs 20–21. *Geissleria kriegei*. \*Denotes taxon or OTU found at > 1% relative abundance (RA) identified from 2018 samples and 1956 archived slides collected from Upper Three Runs Creek, South Carolina.

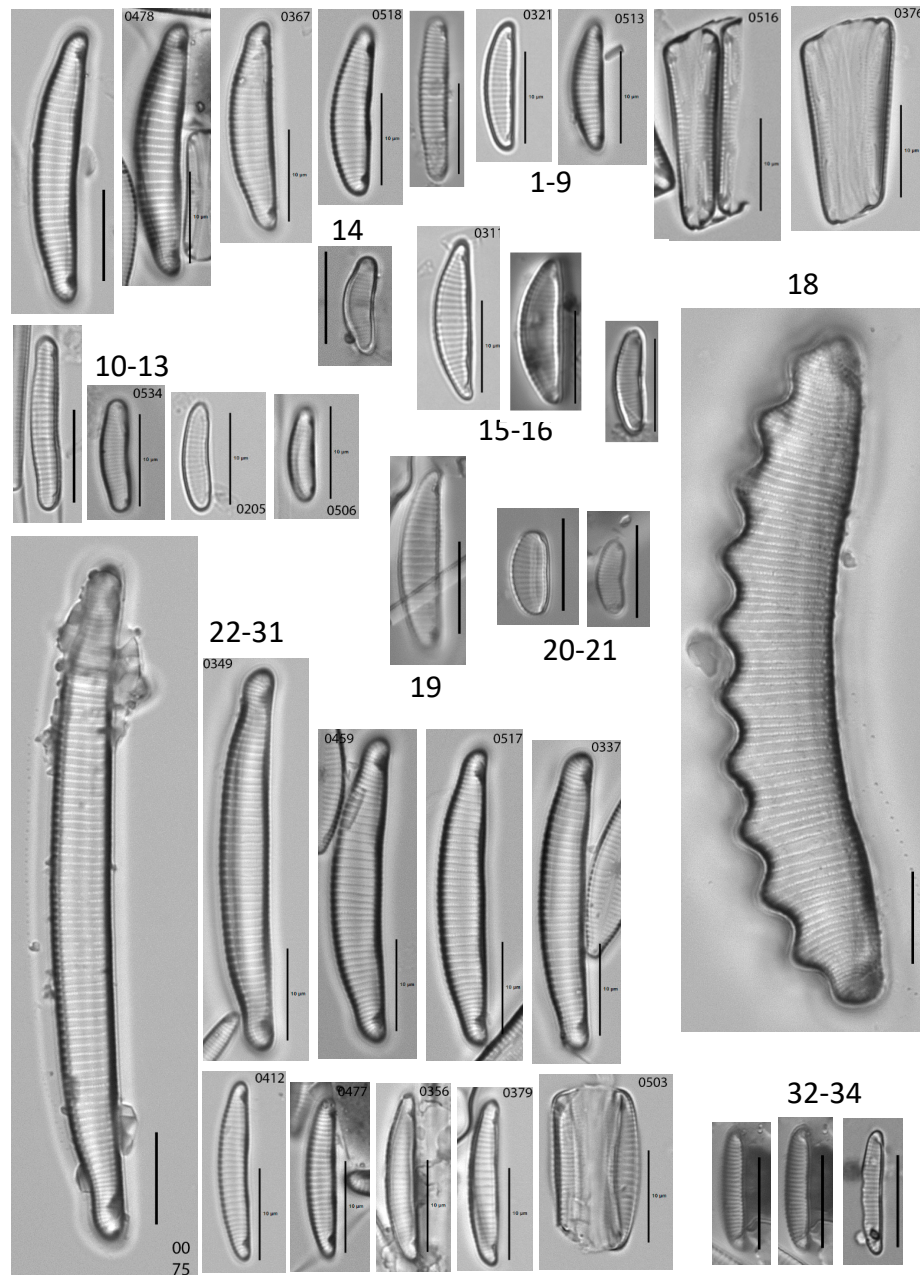

**Plate S4.** Diatoms at Upper Three Runs Creek site in 2018: Figs 1–9. *Eunotia rhomboidea* with girdle (Figs. 8–9)\*; Figs 10–13. *Eunotia mucophila*; Fig 14. *Eunotia schwabei*; Figs 15–16. *Eunotia pirla*; Fig 17. *Eunotia mucophila* var. 1; Fig 18. *Eunotia serra*; Fig 19. *Eunotia veneris*; Figs 20–21. *Eunotia subarcuatoides*; Figs 22–31. *Eunotia incisa* with girdle (Fig. 31)\*; Figs 32–34. *Eunotia* cf. *botulitropica*. \*Denotes taxon or OTU found at > 1% relative abundance (RA) identified from 2018 samples and 1956 archived slides collected from Upper Three Runs Creek, South Carolina. Scale bars = 10  $\mu$ m.

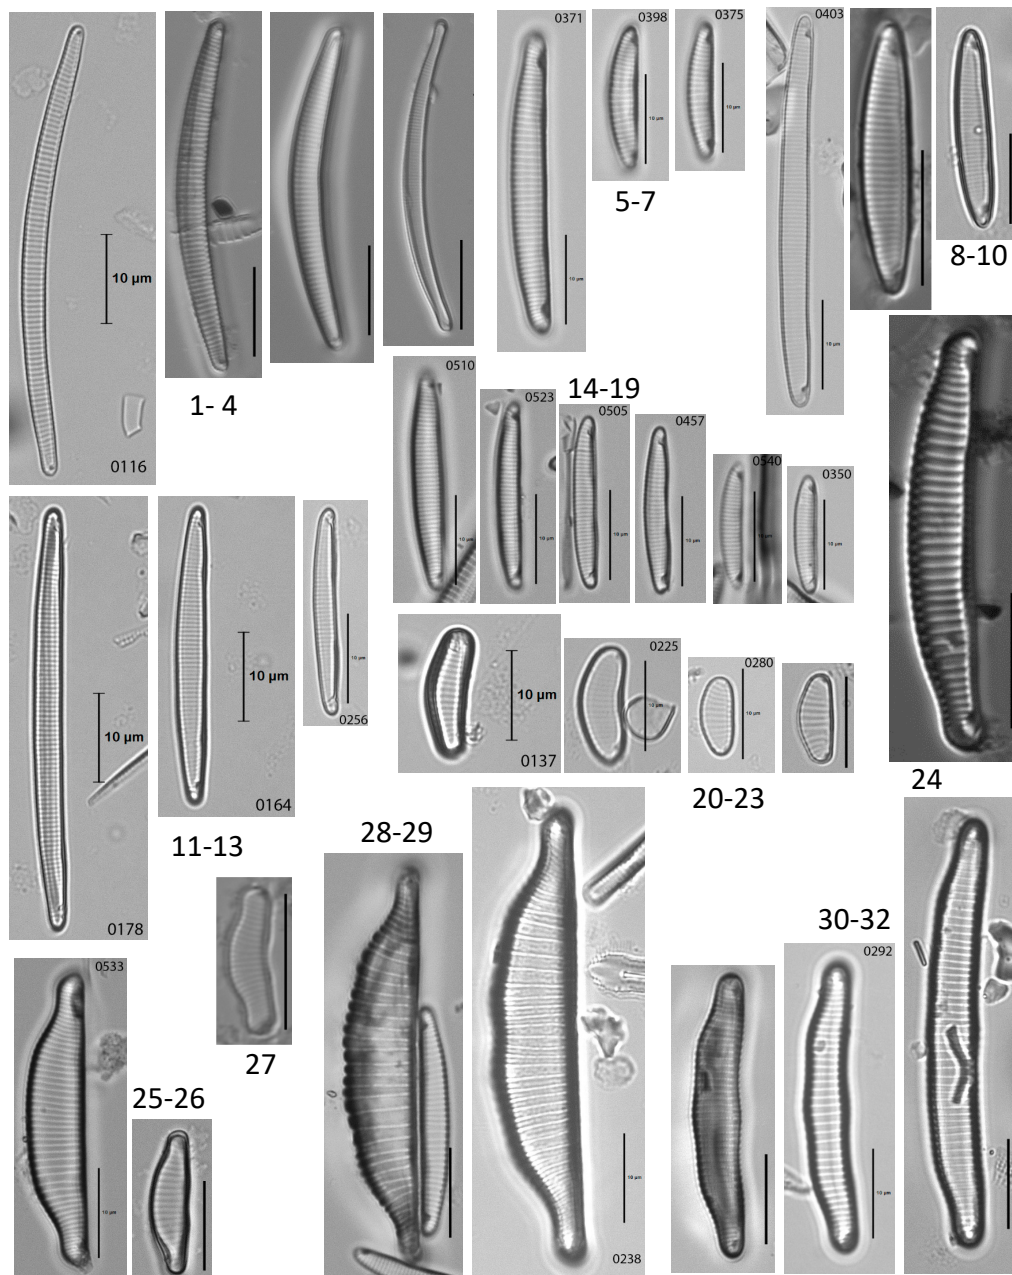

**Plate S5.** Diatoms at Upper Three Runs Creek site in 2018: Scale bars = 10 µm. Figs 1–4. *Eunotia bilunaris*; Figs 5–7. *Eunotia* site 4; Figs 8–10. *Eunotia* site 2; Figs 11–13. *Eunotia* site 3; Figs 14–19. *Eunotia* site; Figs 20–23. *Eunotia boreotenuis*; Fig 24. *Eunotia* cf. *macroglossa*; Figs 25–26. *Eunotia carolina*; Fig 27. *Eunotia exigua*; Figs 28–29. *Eunotia* 238 new; Figs 30–32. *Eunotia pectinalis* var. *undulata*.

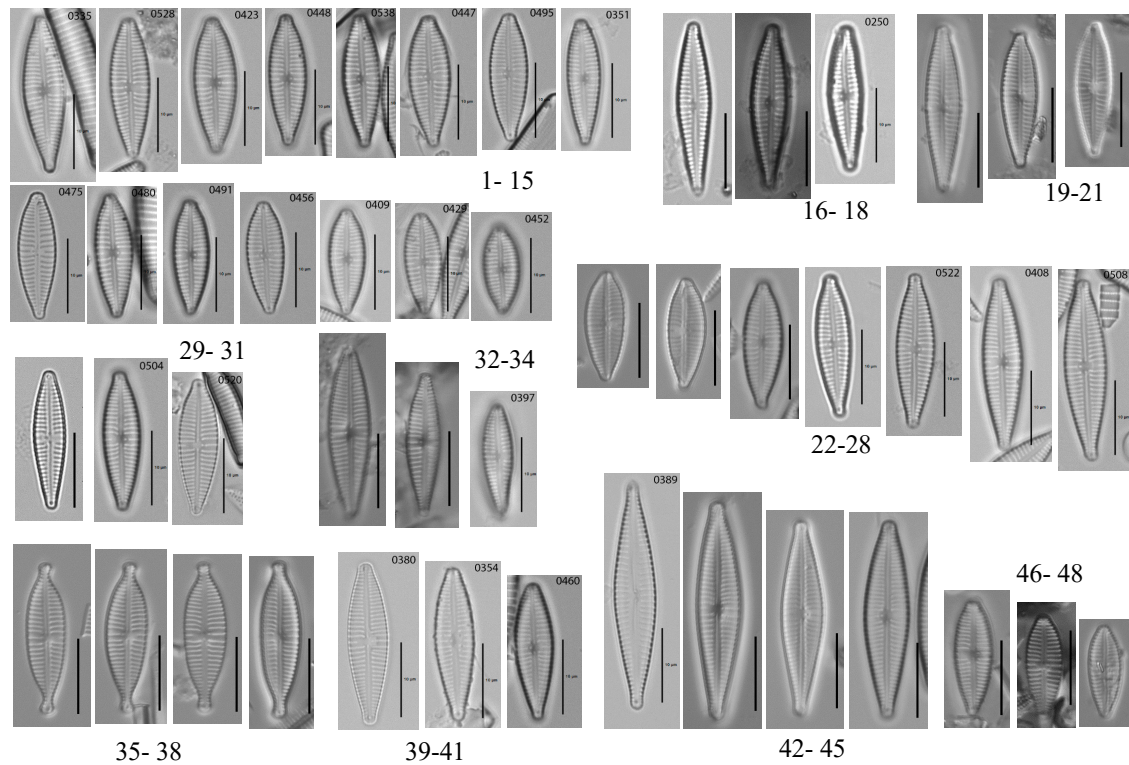

**Plate S6.** Light micrographs of *Gomphonema parvulum sensu lato* species complex separations used in this study: Figs 1–15. *Gomphonema parvulum sensu lato*; Figs 16–18. *Gomphonema exilissimum*; Figs 19–21. *Gomphonema parvulum* Morphotype 2; Figs 22–28. *Gomphonema parvulum* “protracted and off-center”\*; Figs 29–31. *Gomphonema parvulum* “intermedio”; Figs 32–34. *Gomphonema parvulum* “radial—rhombic”; Figs 35–38. *Gomphonema lagenula*; Figs 39–41. *Gomphonema parvulum* “rhombic”; Figs 42–45. *Gomphonema parvulum* “Cox”; Figs 46–48. *Gomphonema confusum*. \*Denotes taxon or OTU found at > 1% relative abundance (RA) identified from 2018 samples and 1956 archived slides collected from Upper Three Runs Creek, South Carolina. Scale bars = 10  $\mu\text{m}$ .

**Table S1.** Morphological features distinguishing taxa originally belonging to *Gomphonema parvulum sensu lato* species complex for 2018 Upper Three Runs Creek study.

| Taxon/OTU                                                                       | Length ( $\mu\text{m}$ ) | Width ( $\mu\text{m}$ ) | Striae density (in 10 $\mu\text{m}$ ) | Raphe                                                                        | Central area                                                   | Striae orientation                                                           | Valve and Pole shape                                      | Previous literature |
|---------------------------------------------------------------------------------|--------------------------|-------------------------|---------------------------------------|------------------------------------------------------------------------------|----------------------------------------------------------------|------------------------------------------------------------------------------|-----------------------------------------------------------|---------------------|
| <i>Gomphonema parvulum sensu lato</i><br><b>Plate A6, Figs. 1–15</b>            | 12.6-31                  | 4.5-5.7                 | 14-20                                 | Narrow                                                                       | Small-moderate depending on area opposite isolated punctum     | Not radial across transapical axis, parallel or curved toward isolate puncta | Ends rostrate, valves elliptic-lanceolate                 | [13]<br>[16]        |
| <i>G. exilissimum</i><br><b>Plate A6, Figs. 16–18</b>                           | 19.9-23.5                | 4.5-5.2                 | 15-17                                 | Narrow, weakly undulate                                                      | Small, rectangular depending on area opposite isolated punctum | Mostly radiate throughout                                                    | Ends rostrate and rounded, valves linear-lanceolate       | [16]                |
| <i>G. parvulum</i> morphotype 2<br><b>Plate A6, Figs. 19–21</b>                 | 12.4-18.9                | 4.5-5.2                 | 17-20                                 | Similar to <i>G. parvulum sensu lato</i>                                     | Similar to <i>G. exilissimum</i>                               | Similar to <i>G. exilissimum</i> and radial across transapical axis          | Sub-capitate headpole, valve more lanceolate              | [16]                |
| <i>G. parvulum</i> “off- center and protracted”<br><b>Plate A6, Figs. 22–28</b> | 18.8-24.6                | 4.5-5.6                 | 16-21                                 | Asymmetrical along the apical axis, also bisecting foot poles asymmetrically | Small                                                          | Variable-weakly radiate, curved near isolate punctum in central area         | Ends protracted and headpoles capitate, valves lanceolate | n/a                 |

|                                                                     |           |          |                 |                                             |                                                                                          |                                                                                      |                                                                                      |              |
|---------------------------------------------------------------------|-----------|----------|-----------------|---------------------------------------------|------------------------------------------------------------------------------------------|--------------------------------------------------------------------------------------|--------------------------------------------------------------------------------------|--------------|
| <i>G. parvulum</i> "intermedio"<br><b>Plate A6, Figs. 29–31</b>     | 18.3-19.1 | 5.3-5.4  | 16-18           | Similar to<br><i>G. parvulum sensu lato</i> | Small                                                                                    | Not radial across transapical axis, radiate or curved on one side of the apical axis | Ends weakly protracted and headpoles weakly capitate, valves lanceolate-rhombic      | n/a          |
| <i>G. parvulum</i> "radial-rhombic"<br><b>Plate A6, Figs. 32–34</b> | 15.1-20.5 | 3.5      | 15-20           | Similar to<br><i>G. parvulum sensu lato</i> | Small                                                                                    | Radial across transapical axis                                                       | Valves rhombic                                                                       | n/a          |
| <i>G. lagenula</i><br><b>Plate A6, Figs. 35–38</b>                  | 16-20.1   | 4.6-5.7  | 17-18           | Straight and filiform                       | Asymmetric, depending on area opposite isolated punctum                                  | Parallel–slightly radiate                                                            | Ends distinctly capitate, valves slightly narrow lanceolate to elliptic              | [13]<br>[36] |
| <i>G. parvulum</i> "rhombic"<br><b>Plate A6, Figs. 39–41</b>        | 19.3-23.2 | 4.9-5.7  | 16-17           | Similar to<br><i>G. parvulum sensu lato</i> | Small                                                                                    | Not radial across transapical axis                                                   | Valves rhombic                                                                       | n/a          |
| <i>G. parvulum</i> "Cox"<br><b>Plate A6, Figs. 42–45</b>            | 23.2-34.6 | 3.3-10.6 | (10)-14-18 (21) | Narrow, weakly undulate                     | Small to moderate, rectangular depending on cell size and area opposite isolated punctum | Slightly radiate throughout                                                          | Foot poles acutely rounded and head poles broader and more obtuse, valves lanceolate | [37]         |
| <i>G. confusum</i><br><b>Plate A6, Figs. 46–48</b>                  | 14.8-22.3 | 4.5-5.1  | 15-18           | Similar to<br><i>G. parvulum sensu lato</i> | Small, rectangular depending on area opposite isolated punctum                           | Radiate to parallel across transapical axis                                          | Ends acutely rounded and protracted, valves lanceolate to rhombic-lanceolate         | [16]         |

**Table S2.** List of diatom taxa and operational taxonomic units (OTUs) found at > 1% relative (RA) identified from 2018 samples and 1956 archived slides collected from Upper Three Runs Creek, South Carolina. In sample type, R= right diatometer, L= left diatometer, NC= 2018 composite, OC= 1956 composite, and A= present in all sample types. \* Denotes relative abundance with taxa not split from species complexes for *Gomphonema parvulum sensu lato*, *Eunotia incisa sensu lato*, and *Tabellaria flocculosa sensu lato*. In RA, (-) represents taxa not found in sample year or scored < 1% relative abundance.

| Scientific name/ OTU                                    | 2018 | 1956 | Sample type | %RA 2018  | %RA 1956 | Ecological indication                                                                                                                                                                                                                                                                                                                                                                                                                                                          | Literature |
|---------------------------------------------------------|------|------|-------------|-----------|----------|--------------------------------------------------------------------------------------------------------------------------------------------------------------------------------------------------------------------------------------------------------------------------------------------------------------------------------------------------------------------------------------------------------------------------------------------------------------------------------|------------|
| <i>Eunotia</i> spp. girdle                              | X    | X    | A           | 31.5      | 10.0     | Genus ecology: found in soft-water lakes, oligotrophic, areas with low light, low turbulence, narrow temperature gradient; acidophilic                                                                                                                                                                                                                                                                                                                                         | [38-39]    |
| <i>Eunotia incisa</i><br><b>Plate A4, Figs. 22–31</b>   | X    | X    | A           | 3.7, 4.8* | -, 2.3*  | Acidobiontic; optimums: pH 5.87, TP 9.85, DOC 9.21, acidophilic; epiphytic on bryophytes in streams and observed on wet walls; common and abundant in peat bogs, acidic waters, and low electric conductance, most frequent taxon in Holarctic zone; acidophilic, high (100% saturation) oxygen requirements, tolerating small concentrations of organic nitrogen, oligosaprobous, oligotraphentic, mainly occurring in water, but sometimes in wet places out of water bodies | [38- 42]   |
| <i>Eunotia rhomboidea</i><br><b>Plate A4, Figs. 1–9</b> | X    | X    | A           | 8.3       | 2.0      | Optimums: pH 4.89, TP 7.48, DOC 6.95, acidophilic; epiphytic on bryophytes in streams; cosmopolitan, found in oligotrophic to dystrophic waters, and in mineral poor and acidic environments; also found in waters with high nutrient concentrations; acidophilic, high (100% saturation)                                                                                                                                                                                      | [39-43]    |

|                                                                                    |   |   |          |            |           |                                                                                                                                                                                                                                                                                                        |                  |
|------------------------------------------------------------------------------------|---|---|----------|------------|-----------|--------------------------------------------------------------------------------------------------------------------------------------------------------------------------------------------------------------------------------------------------------------------------------------------------------|------------------|
|                                                                                    |   |   |          |            |           | oxygen requirements, can tolerate small concentrations of organic nitrogen, oligosaprobic, oligotraphentic, and mainly found in water, but regularly found in wet places                                                                                                                               |                  |
| <i>Fragilaria</i> spp. girdle                                                      | - | X | OC       | -          | 1.1       | Genus ecology: dominate headwater reaches, nutrient rich environments, and settle rapidly                                                                                                                                                                                                              | [38]             |
| <i>Fragilariforma</i> spp. girdle<br><b>Plate 1A, Figs. 11–12</b>                  | X | X | A        | 9.8        | -         | Acidophilic, and occurring in environments high in tannic acid                                                                                                                                                                                                                                         | This 2018 study  |
| <i>Fragilariforma virescens</i> var. 1<br><b>Plate 1A, Figs. 4–6</b>               | X | - | NC, R, L | 1.1        | -         | pH indifferent, oligosaprobic, current (flow) indifferent, found in streams and ditches, and seasons spring and fall                                                                                                                                                                                   | [44]             |
| <i>Frustulia crassinervia</i><br><b>Plate 3A, Figs. 13</b>                         | X | X | R, L, OC | -          | 1.8       | Acidophilic; genus found in soft-water lakes; acidophilic; acidobiontic, high (100% saturation) oxygen requirements, tolerating small concentration of organic nitrogen, oligosaprobic, oligotraphentic, mainly in water regularly in wet places                                                       | [38, 40, 42]     |
| <i>Frustulia saxonica</i>                                                          | - | X | OC       | -          | 1.1       | Genus ecology: found in soft-water lakes;<br>Species ecology: pH optimum 5.49; acidophilic; acidobiontic, high (100% saturation) oxygen requirements, tolerating small concentrations of organic nitrogen, oligosaprobic, oligotraphentic, mainly found in water, but regularly observed in wet places | [38, 40, 42]     |
| <i>Gomphonema</i> spp. girdle<br><b>Plate A1, Fig. 3</b>                           | X | X | A        | 5.3        | 8.1       | Genus ecology: found in areas of high light, high turbulence, broad temperature ranges, found in nutrient rich environments, and oligotrophic hard water                                                                                                                                               | [38]             |
| <i>Gomphonema parvulum</i> Morphotype 2<br><b>Plate A6, Figs. 26–28</b>            | X | X | A        | 2.5        | -         | Found in eutrophic and moderately polluted waters                                                                                                                                                                                                                                                      | [16]             |
| <i>Gomphonema parvulum</i> “protracted off-center”<br><b>Plate A6, Figs. 22–28</b> | X | - | NC, R, L | 3.1        | -         | Acidophilic, and occurring in environments high in tannic acid                                                                                                                                                                                                                                         | This 2018 study  |
| <i>Gomphonema parvulum sensu lato</i><br><b>Plate A6, Figs. 1–15</b>               | X | X | A        | 7.2, 16.2* | 1.5, 3.4* | Optimums: pH 6.66, DOC 5.86; pH indifferent, mesosaprobic, thriving in flowing water, periphytic, mesothermal and stenothermal; found in eutrophic and moderately to highly polluted waters, observed in oligotrophic environments; circumneutral, found in                                            | [16, 40, 42, 44] |

|                                                                                                                                   |   |   |           |   |     |                                                                                                                                                                                                                                                                                                                                                                                                                          |                 |
|-----------------------------------------------------------------------------------------------------------------------------------|---|---|-----------|---|-----|--------------------------------------------------------------------------------------------------------------------------------------------------------------------------------------------------------------------------------------------------------------------------------------------------------------------------------------------------------------------------------------------------------------------------|-----------------|
|                                                                                                                                   |   |   |           |   |     | fresh-brackish, needs periods of high organic nitrogen concentrations, low (above 30% saturation) oxygen requirements, mainly occurring in water, but regularly observed in moist and wet places                                                                                                                                                                                                                         |                 |
| <i>Gomphonema preliciae</i>                                                                                                       | - | X | OC        | - | 1.2 | Epiphytic on macrophytes, found in shallow areas, and in eutrophic to hyper-eutrophic environments                                                                                                                                                                                                                                                                                                                       | [16]            |
| <i>Luticola</i> spp. girdle                                                                                                       | X | X | NC, OC    | - | 1.5 | Acidophilic, and occurring in environments high in tannic acid                                                                                                                                                                                                                                                                                                                                                           | This 2018 study |
| <i>Luticola goeppertiana</i><br><b>Plate A3, Figs. 9–11</b>                                                                       | X | X | NC, OC, L | - | 5.4 | Found in eutrophic and eusaprobic environments; circumneutral, found in fresh-brackish water, needs periods of high organic nitrogen concentrations, low (above 30% saturation) oxygen requirements, mainly occurring in water, but regularly observed in moist and wet places; found in “electrolyte-rich running waters” and rivers with high industrial pollution                                                     | [16, 42, 45]    |
| <i>L. goeppertiana</i> girdle<br><b>Plate A3, Fig. 11</b>                                                                         | X | X | NC, OC    | - | 2.0 |                                                                                                                                                                                                                                                                                                                                                                                                                          |                 |
| <i>Navicula leptostriata</i><br><b>Plate A3, Fig. 16</b>                                                                          | X | X | R, L, OC  | - | 1.3 | Genus ecology: found in eulittoral environments and areas of low light, can survive in groundwater, and resettle rapidly from suspension; Species ecology: optimums: pH 6.26, TP 13.07, DOC 15.48, acidophilic; acidophilic, high (100% saturation) oxygen requirements, tolerates small concentrations of organic nitrogen, oligosaprobous, oligo-mesotraphentic, mainly in water, and regularly observed in wet places | [38, 40, 42]    |
| <i>Navicula notha</i><br><b>Plate A3, Fig. 15</b>                                                                                 | X | X | NC, OC    | - | 2.1 | Genus ecology: found in eulittoral environments and areas of low light, can survive in groundwater, and resettle rapidly from suspension; Species ecology: Alkaliphilous, found in eutrophic environments, halobionts indifferent, current (flow) indifferent, observed in lakes and ponds, periphytic                                                                                                                   | [38, 44]        |
| Past “ <i>Navicula minima</i> group”<br>( <i>Navicula difficillima</i> /<br><i>Sellaphora difficillima</i> / <i>Adlafia</i> spp.) | X | X | L, OC     | - | 2.1 | Alkaphilous, found in fresh- brackish waters, needs periods of high concentrations of organic nitrogen. Low (above 30% saturation) oxygen requirements, eutraphentic, mainly found in water, but regularly observed in wet places                                                                                                                                                                                        | [42]            |
| <i>Nitzschia</i> spp. girdle                                                                                                      | - | X | OC        | - | 2.6 | Diurnal migration, found in low light and nutrient rich environments, remain in suspension longer instead of settling immediately                                                                                                                                                                                                                                                                                        | [38, 46]        |
| <i>Nitzschia recta</i><br><b>Plate A3, Fig. 4–5</b>                                                                               | X | X | NC, L, OC | - | 2.6 | Alkaphilous, found in fresh-brackish water, can tolerate high concentrations of organic nitrogen, fairly high (above 75% saturation) oxygen requirements                                                                                                                                                                                                                                                                 | [42]            |

|                                                                                          |   |   |    |              |     |                                                                                                                                                                                                                                                                                                                                                                                                                                                                                                                                                                                                              |                  |
|------------------------------------------------------------------------------------------|---|---|----|--------------|-----|--------------------------------------------------------------------------------------------------------------------------------------------------------------------------------------------------------------------------------------------------------------------------------------------------------------------------------------------------------------------------------------------------------------------------------------------------------------------------------------------------------------------------------------------------------------------------------------------------------------|------------------|
|                                                                                          |   |   |    |              |     | mesosaprobous, oligo-eutraphentic,<br>never to rarely observed outside of<br>water bodies                                                                                                                                                                                                                                                                                                                                                                                                                                                                                                                    |                  |
| <i>Pinnularia</i> spp. girdle                                                            | - | X | OC | -            | 2.0 | -                                                                                                                                                                                                                                                                                                                                                                                                                                                                                                                                                                                                            | -                |
| <i>Tabellaria flocculosa</i><br>“intermediate”<br><b>Plate A2,</b><br><b>Figs. 17–25</b> | X | X | A  | 1.3,<br>2.6* | -   | <i>Sensu lato</i> ecology: optimums: pH<br>5.22, TP 7.45, DOC 8.83 acidophilic;<br>acidophilous, mesotrophic-<br>oligotrophic-dystrophic, halophobous,<br>found in ponds, periphytic, and<br>tychoplanktonic, seasons spring and<br>fall; acidophilous, fresh water species,<br>tolerating very small concentrations of<br>organic nitrogen, high (about 100% sat)<br>oxygen requirements mesosaprobous,<br>mesotraphentic, mainly occurring in<br>water bodies, and sometimes observed<br>in wet places; oligotrophic, found in<br>areas with high light, high turbulence,<br>and broad temperature changes | [38, 40, 42, 44] |
| <i>Tabellaria</i> spp. girdle<br><b>Plate A2, Fig. 13</b>                                | X | X | A  | -            | 1.4 | Genus ecology: found in soft-water<br>lakes                                                                                                                                                                                                                                                                                                                                                                                                                                                                                                                                                                  | [38]             |

---
